# Supplementary material for: The First Eight Mitogenomes of Leaf-Mining Dactylispa Beetles (Coleoptera: Chrysomelidae: Cassidinae) Shed New Light on Subgenus Relationships
Source: Insects. 2021 Nov 8;12(11):1005. doi: 10.3390/insects12111005 (PMC8624545; doi:10.3390/insects12111005)
Supplement: Supplementary file 1 [file insects-12-01005-s001.zip]

Archive with 4 entries (4 files):
- Figure S1 Circular diagrams of eight Dactylispa mitogenomes.pdf
- File S1 PartitionFinder output files.zip
- Table S1 Summary of eight Dactylispa mitochondrial genomes.xlsx
- Table S2 Nucleotide composition of mitochondrial genomes of eight Dactylispa species .xlsx
