# Supplementary material for: The First Eight Mitogenomes of Leaf-Mining Dactylispa Beetles (Coleoptera: Chrysomelidae: Cassidinae) Shed New Light on Subgenus Relationships
Source: Insects. 2021 Nov 8;12(11):1005. doi: 10.3390/insects12111005 (PMC8624545; doi:10.3390/insects12111005)
Supplement: Supplementary file 1 [file insects-12-01005-s001.zip › Figure S1 Circular diagrams of eight Dactylispa mitogenomes.pdf]

**Figure S1** Circular diagram of eight *Dactylispa* mitogenomes. (A) *D. approximata* (B) *D. albopilosa* (C) *D. longispina* (D) *D. paucispina* (E) *D. nigrodiscalis* (F) *D. chinensis* (G) *D. planispina* (H) *D. latispina*. Genes outside the circle are transcribed in a clockwise direction, whereas those inside the circle transcribed counterclockwise. Protein-coding genes (PCGs) are in blue, tRNA genes are in red, and rRNA genes are in purple. The second circle shows the GC content, and the third shows the GC skew. The GC content and GC skew plotted as the deviation from the average value of the entire sequence.

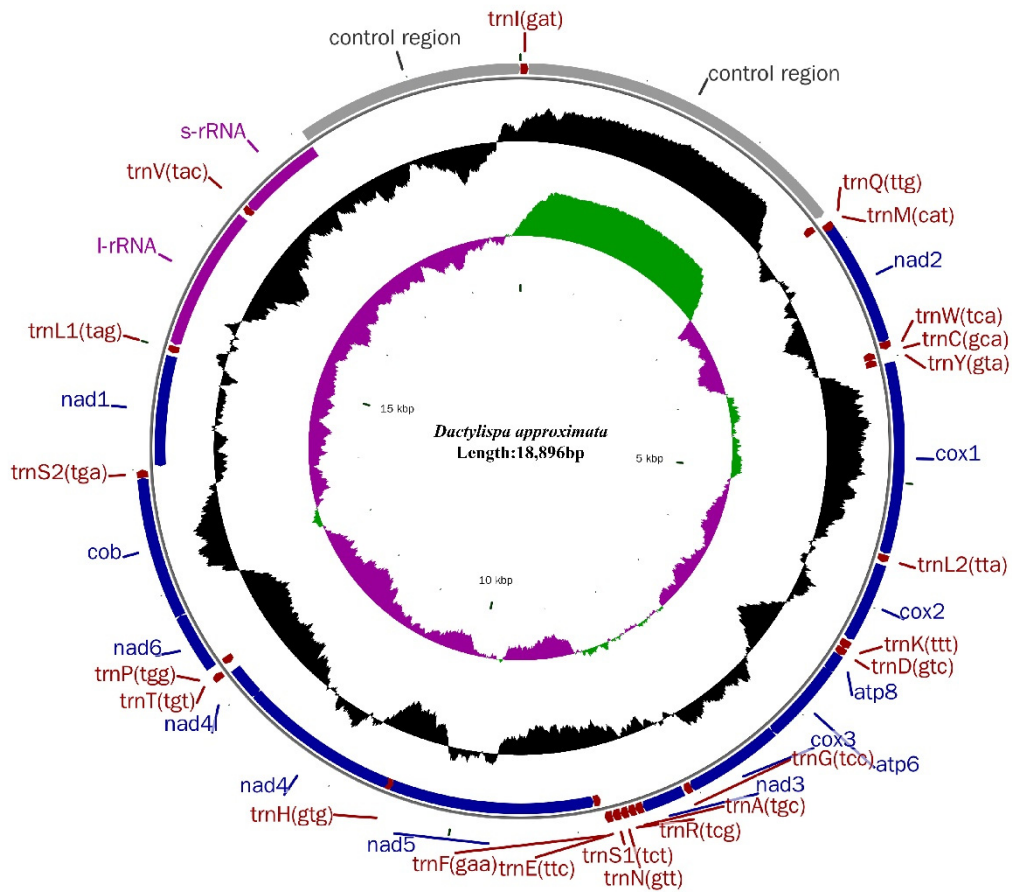

A

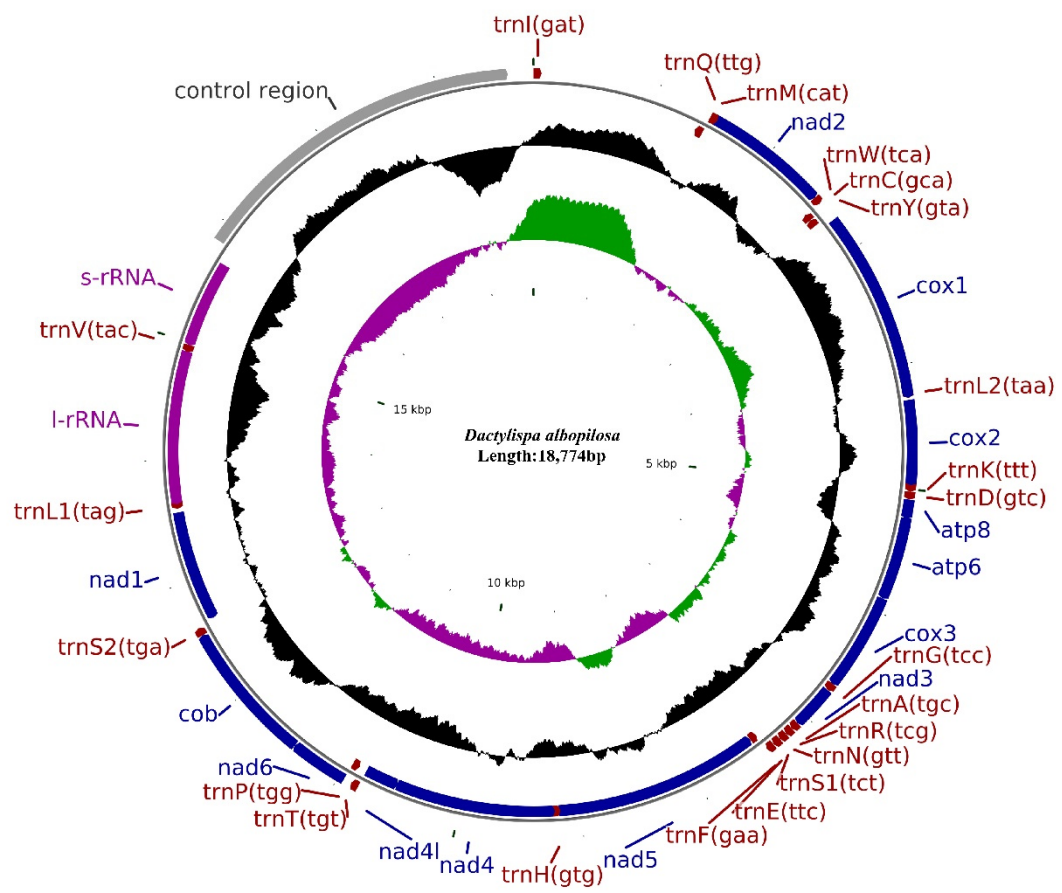

B

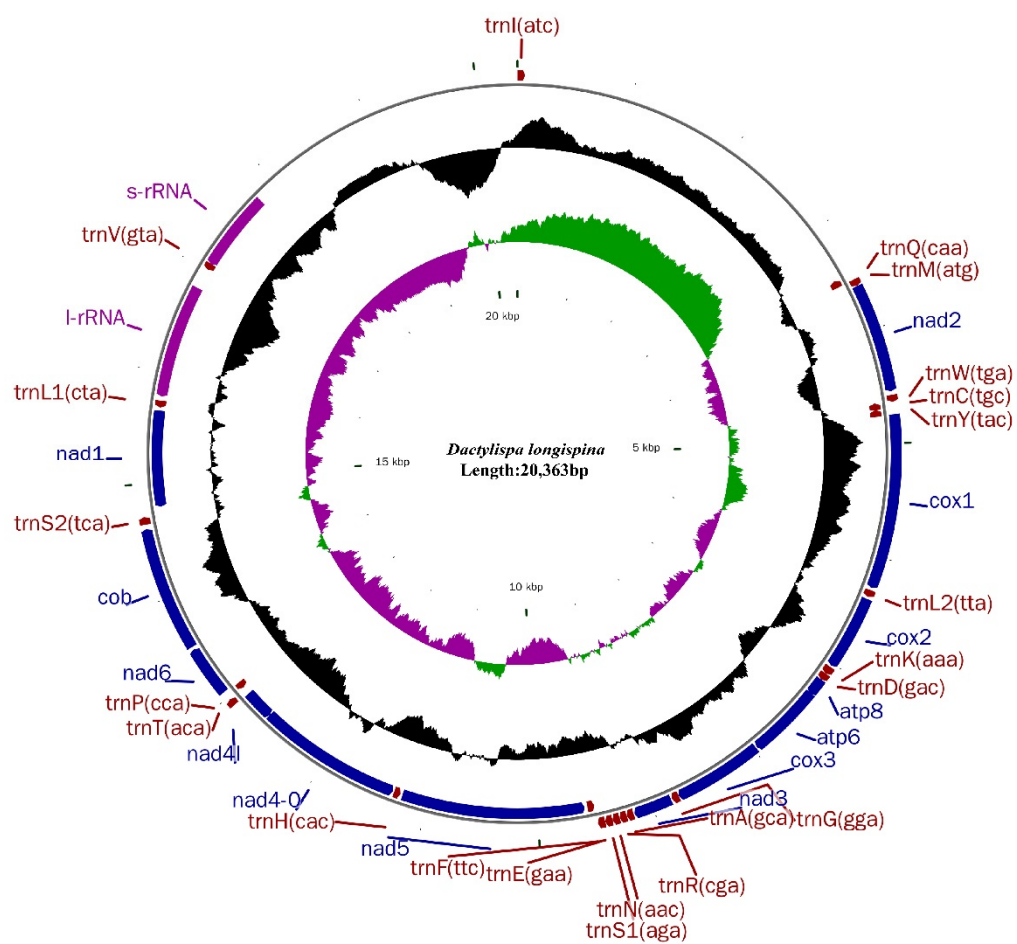

C

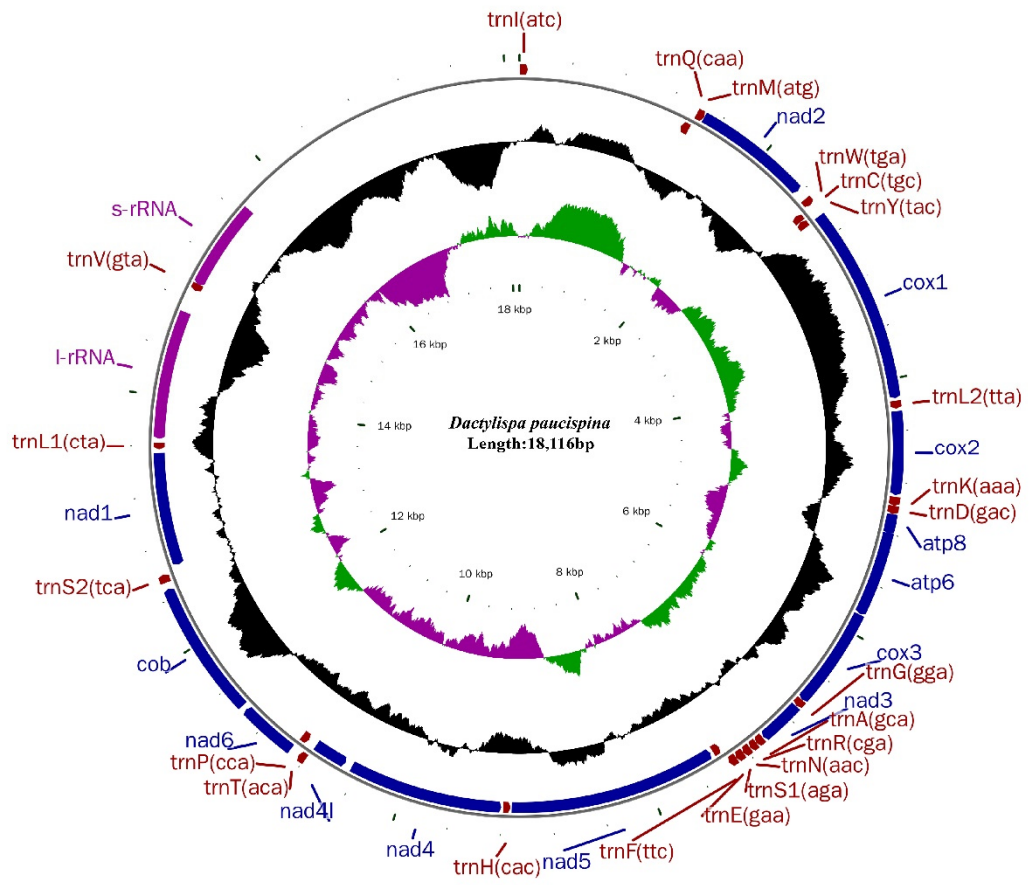

D

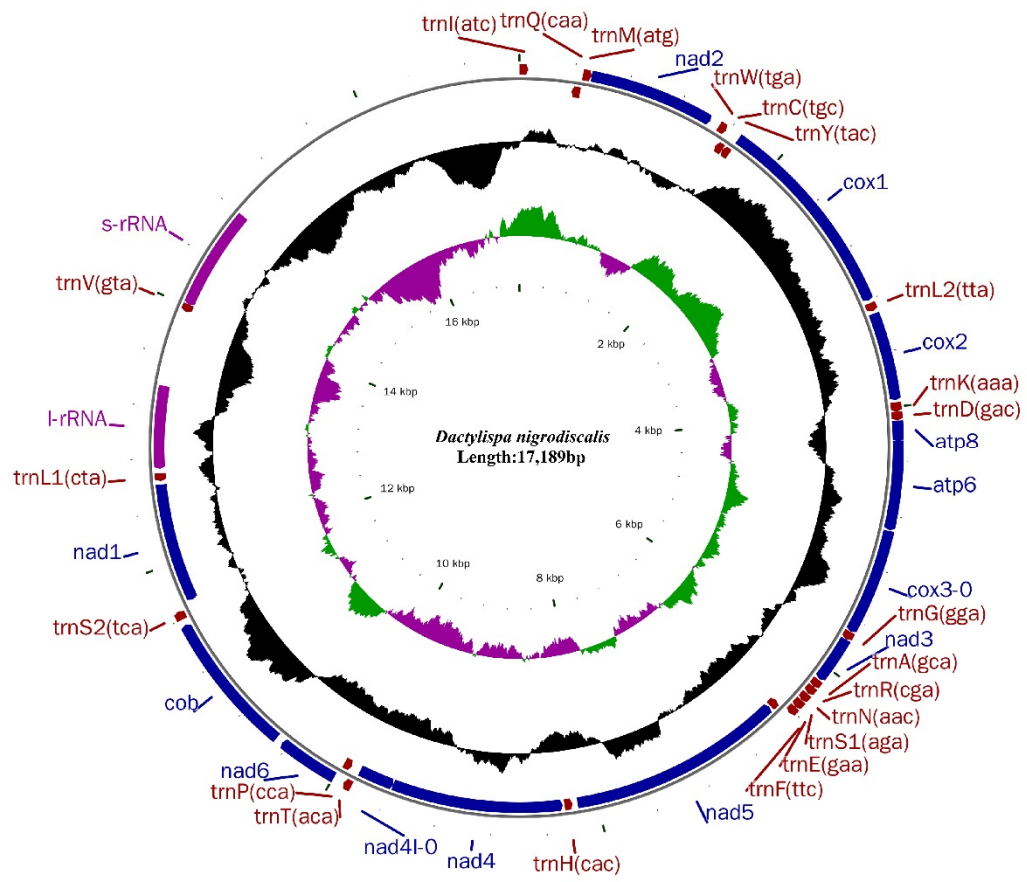

E

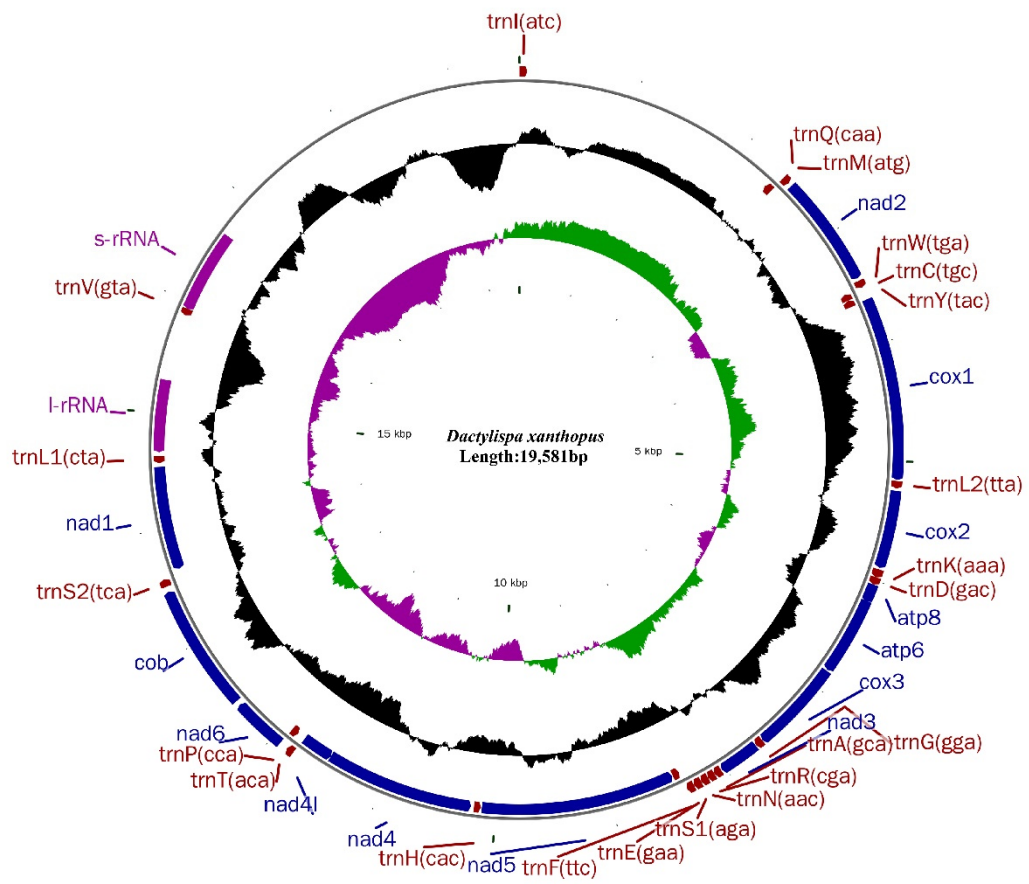

F

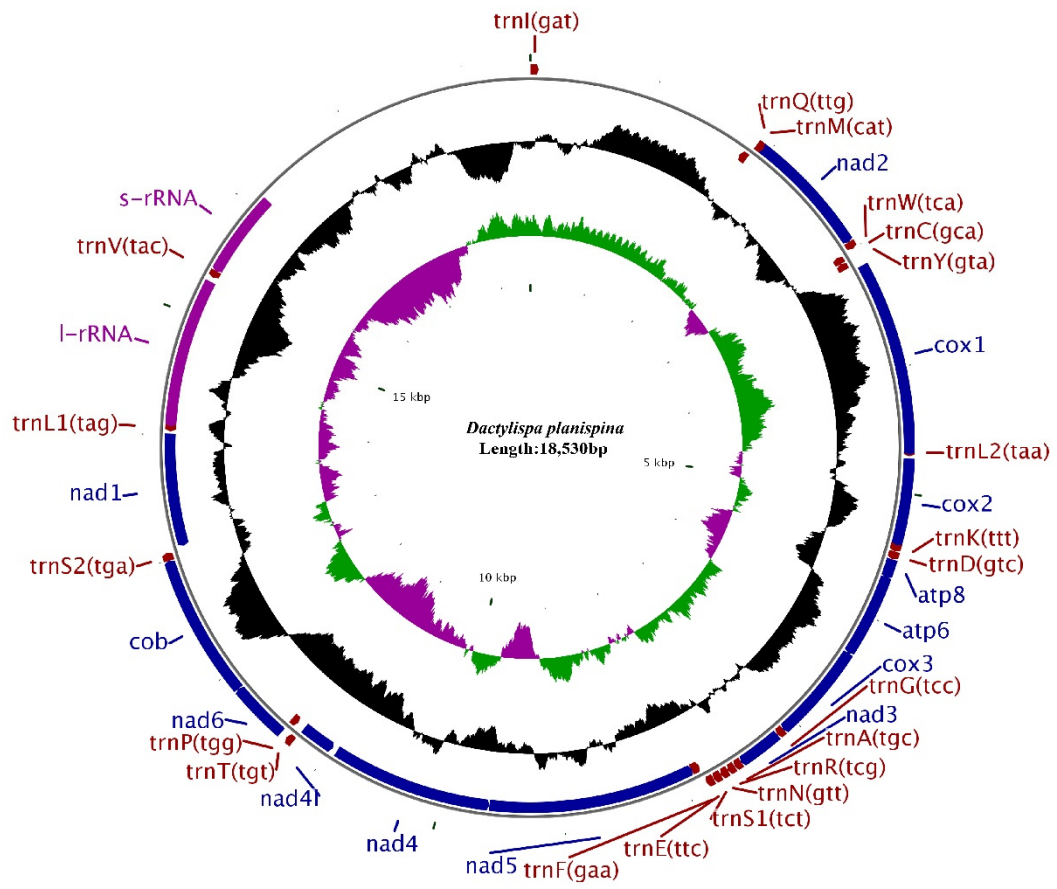

G

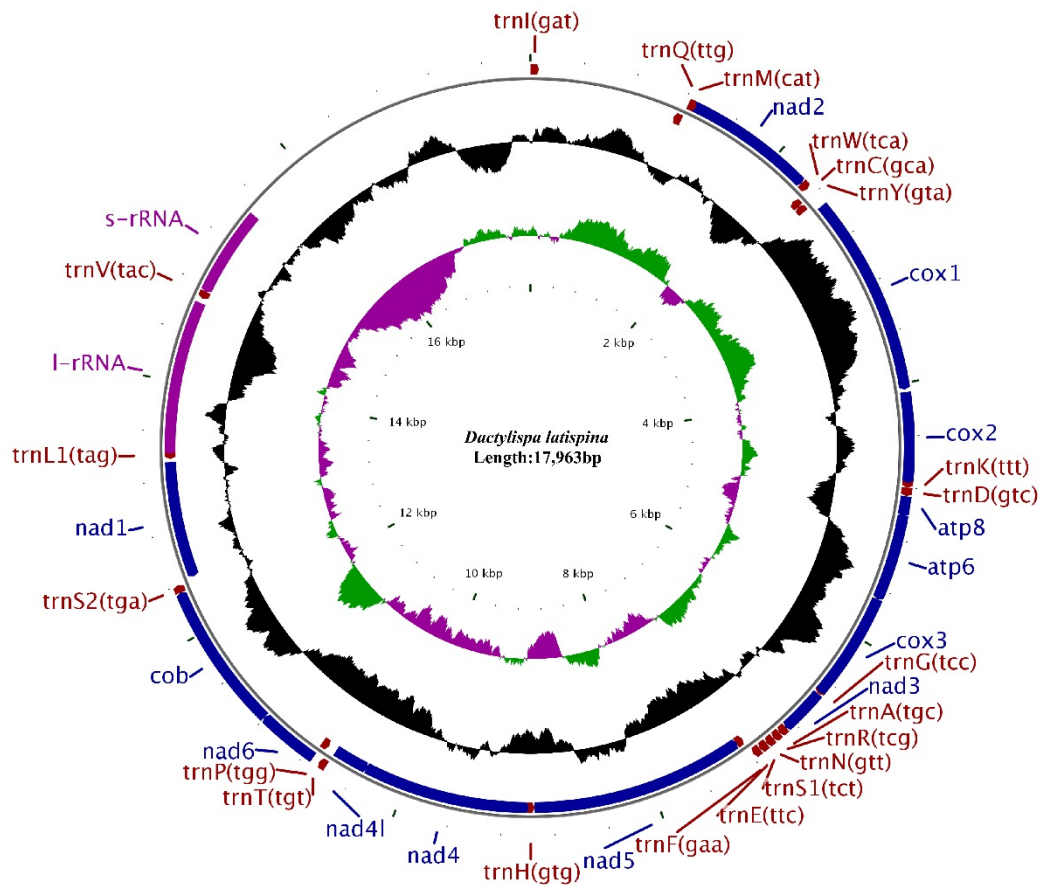

H
