# Supplementary material for: The First Eight Mitogenomes of Leaf-Mining Dactylispa Beetles (Coleoptera: Chrysomelidae: Cassidinae) Shed New Light on Subgenus Relationships
Source: Insects. 2021 Nov 8;12(11):1005. doi: 10.3390/insects12111005 (PMC8624545; doi:10.3390/insects12111005)
Supplement: Supplementary file 1 [file insects-12-01005-s001.zip › Table S1 Summary of eight Dactylispa mitochondrial genomes.xlsx]

## Sheet: Sheet1
Table S1 Summary of eight Dactylispa mitochondrial genomes
Dactylispa approximata									Dactylispa albopilosa									Dactylispa longispina									Dactylispa planispina									Dactylispa latispina									Dactylispa nigrodiscalis
Gene	Strand	Position	Length	Initiation codon	Stop codon	Condon	Anticodon		Gene	Strand	Position	Length	Initiation codon	Stop codon	Condon	Anticodon		Gene	Strand	Position	Length	Initiation codon	Stop codon	Condon	Anticodon		Gene	Strand	Position	Length	Initiation codon	Stop codon	Condon	Anticodon		Gene	Strand	Position	Length	Initiation codon	Stop codon	Condon	Anticodon		Gene	Strand	Position	Length	Initiation codon
trnI	H	1-65	65			ATC	GAT		trnI	H	1-65	65			ATC	GAT		trnI	H	1-65	65			ATC	GAT		trnI	H	1-65	65			ATC	GAT		trnI	H	1-65	65			ATC	GAT		trnI	H	1-64	64
trnQ	L	2758-2823	66			CAA	CAA		trnQ	L	1386-1452	67			CAA	CAA		trnQ	L	3475-3541	67			CAA	CAA		trnQ	L	1825-1891	67			CAA	CAA		trnQ	L	1165-1231	67			CAA	CAA		trnQ	L	392-462	71
trnM	H	2823-2887	65			ATG	CAT		trnM	H	1452-1515	64			ATG	CAT		trnM	H	3541-3603	63			ATG	CAT		trnM	H	1891-1954	64			ATG	CAT		trnM	H	1231-1294	64			ATG	CAT		trnM	H	462-524	63
nad2	H	2888-3871	984	ATA	TAA				nad2	H	1516-2499	984	ATA	TAA				nad2	H	3604-4587	984	ATA	TAA				nad2	H	1931-2941	1011	ATT	TAA				nad2	H	1295-2281	987	ATA	TAA				nad2	H	525-1514	990	ATA
trnW	H	3870-3932	63			TGA	TCA		trnW	H	2498-2559	62			TGA	TCA		trnW	H	4586-4647	62			TGA	TCA		trnW	H	2940-3002	63			TGA	TCA		trnW	H	2280-2342	63			TGA	TCA		trnW	H	1518-1579	62
trnC	L	3925-3986	62			TGC	TGC		trnC	L	2552-2611	60			TGC	TGC		trnC	L	4640-4699	60			TGC	TGC		trnC	L	2995-3055	61			TGC	TGC		trnC	L	2335-2395	61			TGC	TGC		trnC	L	1572-1632	61
trnY	L	3987-4047	61			TAC	TAC		trnY	L	2612-2673	62			TAC	TAC		trnY	L	4700-4760	61			TAC	TAC		trnY	L	3056-3115	61			TAC	TAC		trnY	L	2396-2456	61			TAC	TAC		trnY	L	1633-1693	61
cox1	H	4040-5580	1541	ATC	TA-				cox1	H	2666-4206	1541	ATT	TA-				cox1	H	4753-6293	1541	ATT	TA-				cox1	H	3108-4648	1548	ATT	TA-				cox1	H	2449-3989	1541	ATT	TA-				cox1	H	1686-3226	1541	ATT
trnL2(UUR)	H	5581-5643	63			TTA	TAA		trnL2(UUR)	H	4207-4269	63			TTA	TAA		trnL2(UUR)	H	6294-6356	63			TTA	TAA		trnL2(UUR)	H	4649-4710	62			TTA	TAA		trnL2(UUR)	H	3990-4052	63			TTA	TAA		trnL2(UUR)	H	3227-3289	63
cox2	H	5647-6322	676	ATA	T-				cox2	H	4273-4948	676	ATA	T-				cox2	H	6360-7038	679	ATA	T-				cox2	H	4714-5392	679	ATA	T-				cox2	H	4056-4729	674	ATA	TA-				cox2	H	3293-3968	676	ATA
trnK	H	6323-6391	69			AAA	TTT		trnK	H	4949-5018	70			AAA	TTT		trnK	H	7036-7105	70			AAA	TTT		trnK	H	5390-5459	70			AAA	TTT		trnK	H	4732-4801	70			AAA	TTT		trnK	H	3969-4038	70
trnD	H	6391-6454	64			GCA	GTC		trnD	H	5018-5081	64			GCA	GTC		trnD	H	7105-7168	64			GCA	GTC		trnD	H	5459-5522	64			GCA	GTC		trnD	H	4801-4866	66			GCA	GTC		trnD	H	4038-4102	65
atp8	H	6455-6607	153	ATC	TAA				atp8	H	5082-5234	153	ATA	TAA				atp8	H	7169-7321	153	ATA	TAA				atp8	H	5523-5675	153	ATA	TAA				atp8	H	4867-5019	153	ATC	TAG				atp8	H	4103-4255	153	ATT
atp6	H	6607-7263	657	ATA	TAA				atp6	H	5234-5890	657	ATA	TAA				atp6	H	7321-7977	663	ATA	T-				atp6	H	5672-6331	660	ATA	TAA				atp6	H	5016-5675	660	ATA	TAA				atp6	H	4252-4911	660	ATA
cox3	H	7266-8043	778	ATA	TA-				cox3	H	5893-6673	781	ATA	T-				cox3	H	7977-8758	782	ATG	TA-				cox3	H	6334-7114	784	ATA	T-				cox3	H	5678-6456	779	ATA	TA-				cox3	H	4911-5692	782	ATG
trnG	H	8044-8106	63			GAC	TCC		trnG	H	6671-6733	63			GAC	TCC		trnG	H	8758-8820	63			GAC	TCC		trnG	H	7112-7174	63			GAC	TCC		trnG	H	6456-6518	63			GAC	TCC		trnG	H	5692-5755	64
nad3	H	8116-8460	345	ATA	TAG				nad3	H	6734-7087	354	ATA	TAG				nad3	H	8821-9174	354	ATT	TAG				nad3	H	7178-7528	351	ATA	TAG				nad3	H	6522-6872	354	ATA	TAG				nad3	H	5759-6109	351	ATA
trnA	H	8459-8520	62			GCA	TGC		trnA	H	7086-7148	63			GCA	TGC		trnA	H	9173-9234	62			GCA	TGC		trnA	H	7527-7588	63			GCA	TGC		trnA	H	6871-6933	63			GCA	TGC		trnA	H	6108-6170	63
trnR	H	8521-8581	61			CGA	TCG		trnR	H	7148-7210	63			CGA	TCG		trnR	H	9235-9297	63			CGA	TCG		trnR	H	7589-7650	62			CGA	TCG		trnR	H	6934-6995	62			CGA	TCG		trnR	H	6171-6232	62
trnN	H	8582-8644	63			AAC	GTT		trnN	H	7211-7273	63			AAC	GTT		trnN	H	9298-9360	63			AAC	GTT		trnN	H	7651-7714	64			AAC	GTT		trnN	H	6996-7059	64			AAC	GTT		trnN	H	6236-6299	64
trnS1(AGN)	H	8645-8710	66			AGA	TCT		trnS1(AGN)	H	7274-7338	65			AGA	TCT		trnS1(AGN)	H	9361-9424	64			AGA	TCT		trnS1(AGN)	H	7714-7779	64			AGA	TCT		trnS1(AGN)	H	7060-7124	65			AGA	TCT		trnS1(AGN)	H	6300-6365	66
trnE	H	8711-8774	64			GAA	TTC		trnE	H	7339-7402	64			GAA	TTC		trnE	H	9425-9489	65			GAA	TTC		trnE	H	7779-7841	63			GAA	TTC		trnE	H	7125-7187	63			GAA	TTC		trnE	H	6366-6428	63
trnF	L	8773-8834	62			TTC	TTC		trnF	L	7401-7462	62			TTC	TTC		trnF	L	9488-9550	63			TTC	TTC		trnF	L	7840-7901	62			TTC	TTC		trnF	L	7186-7247	62			TTC	TTC		trnF	L	6427-6489	63
nad5	L	8834-10539	1706	ATA	TTA				nad5	L	7462-9164	1703	ATT	TA-				nad5	L	9550-11252	1703	ATT	TA-				nad5	L	7901-9603	1703	ATT	TA-				nad5	L	7241-8949	1709	ATT	TA-				nad5	L	6489-8191	1703	ATT
trnH	L	10537-10597	61			CAC	CAC		trnH	L	9165-9226	62			CAC	CAC		trnH	L	11253-11314	62			CAC	CAC		trnH	L	9604-9664	61			CAC	CAC		trnH	L	8950-9010	61			CAC	CAC		trnH	L	8192-8253	62
nad4	L	10597-11912	1316	ATG	TA-				nad4	L	9226-10544	1319	ATA	TA-				nad4	L	11314-12632	1319	ATA	TA-				nad4	L	9664-10982	1319	ATA	TA-				nad4	L	9010-10328	1319	ATA	TA-				nad4	L	8253-9571	1319	ATA
nad4L	L	11909-12187	279	ATA	TAA				nad4L	L	10541-10819	279	ATG	TAA				nad4L	L	12629-12913	285	ATG	TAA				nad4L	L	10979-11263	285	ATG	TAA				nad4L	L	10325-10609	285	ATG	TAA				nad4L	L	9568-9852	285	ATG
trnT	H	12196-12258	63			ACA	TGT		trnT	H	10828-10890	63			ACA	TGT		trnT	H	12916-12978	63			ACA	TGT		trnT	H	11266-11328	63			ACA	TGT		trnT	H	10612-10674	63			ACA	TGT		trnT	H	9855-9916	62
trnP	L	12259-12323	65			CCA	CCA		trnP	L	10891-10952	62			CCA	CCA		trnP	L	12979-13040	62			CCA	CCA		trnP	L	11329-11390	62			CCA	CCA		trnP	L	10675-10736	62			CCA	CCA		trnP	L	9917-9978	62
nad6	H	12325-12798	474	ATA	TAA				nad6	H	10954-11424	471	ATA	TAA				nad6	H	13042-13515	474	ATA	TAA				nad6	H	11392-11859	468	ATT	TAA				nad6	H	10729-11205	477	ATT	TAA				nad6	H	9980-10459	480	ATG
cob	H	12798-13937	1140	ATG	TAG				cob	H	11424-12563	1140	ATG	TAG				cob	H	13530-14654	1125	ATA	TAG				cob	H	11859-12998	1140	ATG	TAG				cob	H	11205-12344	1140	ATG	TAG				cob	H	10459-11598	1140	ATG
trnS2(UCN)	H	13936-14001	66			TCA	TGA		trnS2(UCN)	H	12562-12626	65			TCA	TGA		trnS2(UCN)	H	14653-14719	67			TCA	TGA		trnS2(UCN)	H	12997-13061	65			TCA	TGA		trnS2(UCN)	H	12343-12405	63			TCA	TGA		trnS2(UCN)	H	11597-11663	67
nad1	L	14019-14969	951	TTG	TAG				nad1	L	12644-13591	948	ATT	TAG				nad1	L	14737-15687	951	TTG	TAG				nad1	L	13079-14029	951	TTG	TAG				nad1	L	12423-13373	951	TTG	TAG				nad1	L	11681-12628	948	TTG
trnL1(CUN)	L	14971-15033	63			CTA	CTA		trnL1(CUN)	L	13596-13658	63			CTA	CTA		trnL1(CUN)	L	15689-15751	63			CTA	CTA		trnL1(CUN)	L	14031-14092	62			CTA	CTA		trnL1(CUN)	L	13375-13436	62			CTA	CTA		trnL1(CUN)	L	12629-12690	62
rrnL	L	15046-16256	1211						rrnL	L	13635-14924	1290						rrnL	L	15789-16823	1035						rrnL	L	14072-15310	1239						rrnL	L	13415-14655	1241						rrnL	L	12723-13949	1227
trnV	L	16292-16353	62			GTA	GTA		trnV	L	14919-14979	61			GTA	GTA		trnV	L	17011-17071	61			GTA	GTA		trnV	L	15348-15409	62			GTA	GTA		trnV	L	14693-14754	62			GTA	GTA		trnV	L	13950-14011	62
rrnS	L	16351-17077	727						rrnS	L	14977-15705	729						rrnS	L	17069-17796	728						rrnS	L	15407-16125	719						rrnS	L	14752-15471	720						rrnS	L	14009-14801	793
A+T-rich region	/	17078-18896	1819						A+T-rich region	/	15706-18774	3069						A+T-rich region	/	17796-20363	2567						A+T-rich region	/	16126-18530	2045						A+T-rich region	/	15472-17963	2492						A+T-rich region	/	14082-17189	3108
		18896	16156								18774	17490								20363	16739								18530	16448								17963	16877								17189	17558
[truncated: 19 more columns]
