# Supplementary material for: The First Eight Mitogenomes of Leaf-Mining Dactylispa Beetles (Coleoptera: Chrysomelidae: Cassidinae) Shed New Light on Subgenus Relationships
Source: Insects. 2021 Nov 8;12(11):1005. doi: 10.3390/insects12111005 (PMC8624545; doi:10.3390/insects12111005)
Supplement: Supplementary file 1 [file insects-12-01005-s001.zip › Table S2 Nucleotide composition of mitochondrial genomes of eight Dactylispa species .xlsx]

## Sheet: Sheet1
Table S2 Nucleotide composition of mitochondrial genomes of eight Dactylispa species
	Dactylispa approximata								Dactylispa albopilosa								Dactylispa longispina								Dactylispa planispina								Dactylispa latispina								Dactylispa nigrodiscalis								Dactylispa paucispina
	T	C	A	G	A+T%	G+C%	AT-skew	GC-skew	T	C	A	G	A+T%	G+C%	AT-skew	GC-skew	T	C	A	G	A+T%	G+C%	AT-skew	GC-skew	T	C	A	G	A+T%	G+C%	AT-skew	GC-skew	T	C	A	G	A+T%	G+C%	AT-skew	GC-skew	T	C	A	G	A+T%	G+C%	AT-skew	GC-skew	T
Genome	0.342	0.136	0.412	0.109	0.754	0.245	0.0928382	-0.110204	0.302	0.177	0.412	0.109	0.714	0.286	0.154062	-0.237762	0.306	0.167	0.409	0.117	0.715	0.284	0.144056	-0.176056	0.327	0.156	0.418	0.099	0.745	0.255	0.122148	-0.223529	0.324	0.154	0.429	0.093	0.753	0.247	0.139442	-0.246964	0.331	0.147	0.435	0.086	0.766	0.233	0.13577	-0.261803	0.333
PCGs	0.337	0.151	0.418	0.094	0.755	0.245	0.107285	-0.232653	0.302	0.185	0.404	0.11	0.706	0.295	0.144476	-0.254237	0.309	0.181	0.398	0.112	0.707	0.293	0.125884	-0.235495	0.326	0.16	0.41	0.104	0.736	0.264	0.11413	-0.212121	0.323	0.156	0.423	0.098	0.746	0.254	0.134048	-0.228346	0.323	0.156	0.428	0.094	0.751	0.25	0.139814	-0.248	0.328
rRNA	0.337	0.139	0.455	0.069	0.792	0.208	0.14899	-0.336538	0.313	0.161	0.448	0.079	0.761	0.24	0.177398	-0.341667	0.314	0.163	0.441	0.082	0.755	0.245	0.168212	-0.330612	0.345	0.148	0.425	0.082	0.77	0.23	0.103896	-0.286957	0.335	0.15	0.434	0.081	0.769	0.231	0.128739	-0.298701	0.323	0.149	0.45	0.079	0.773	0.228	0.164295	-0.307018	0.337
tRNAs	0.368	0.129	0.405	0.098	0.773	0.227	0.0478655	-0.136564	0.348	0.146	0.399	0.107	0.747	0.253	0.0682731	-0.15415	0.347	0.142	0.403	0.109	0.75	0.251	0.0746667	-0.131474	0.344	0.135	0.417	0.104	0.761	0.239	0.0959264	-0.129707	0.348	0.128	0.425	0.099	0.773	0.227	0.0996119	-0.127753	0.351	0.132	0.416	0.101	0.767	0.233	0.0847458	-0.133047	0.351
Control region	0.368	0.14	0.415	0.077	0.783	0.217	0.0600255	-0.290323	0.288	0.197	0.433	0.082	0.721	0.279	0.20111	-0.412186	0.315	0.175	0.423	0.088	0.738	0.263	0.146341	-0.330798	0.329	0.154	0.444	0.073	0.773	0.227	0.148771	-0.356828	0.318	0.163	0.454	0.065	0.772	0.228	0.176166	-0.429825	0.358	0.124	0.466	0.051	0.824	0.175	0.131068	-0.417143	0.346
[truncated: 15 more columns]
