# Supplementary figures and images for: The First Eight Mitogenomes of Leaf-Mining Dactylispa Beetles (Coleoptera: Chrysomelidae: Cassidinae) Shed New Light on Subgenus Relationships
Source: MDPI journal article supplement (doi:10.3390/insects12111005), 2021-11-08

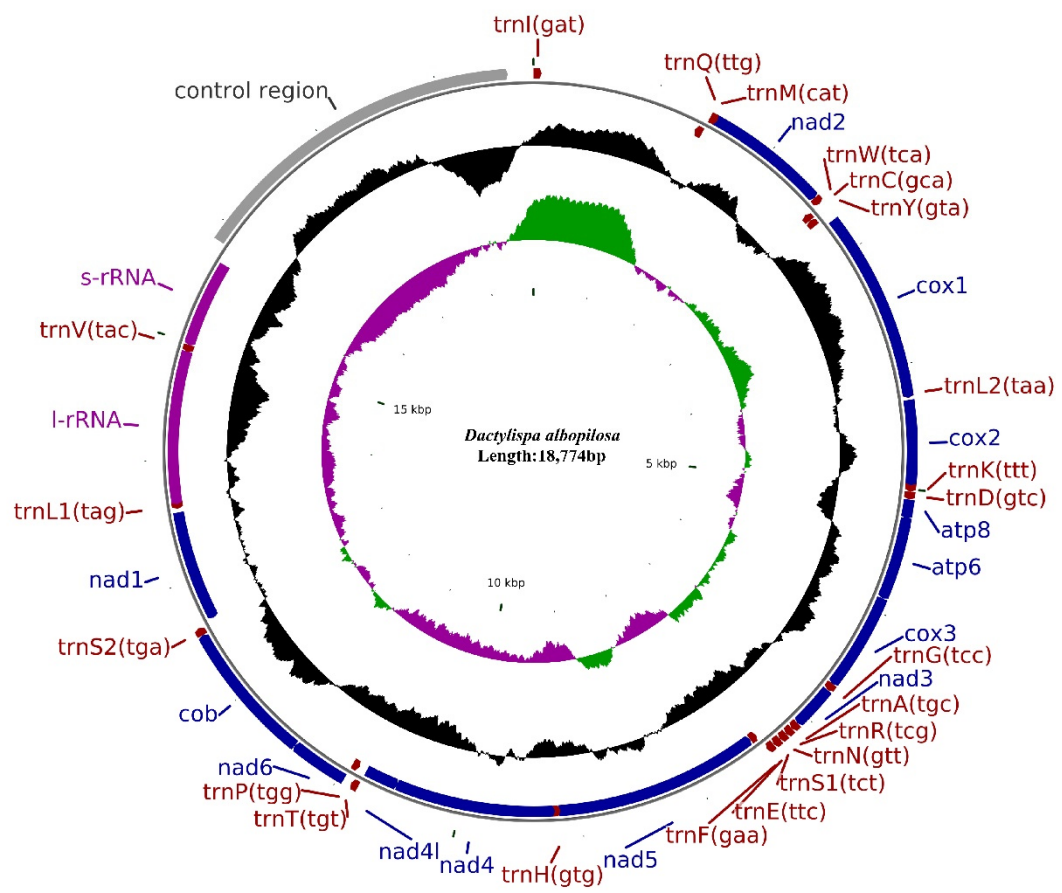

B

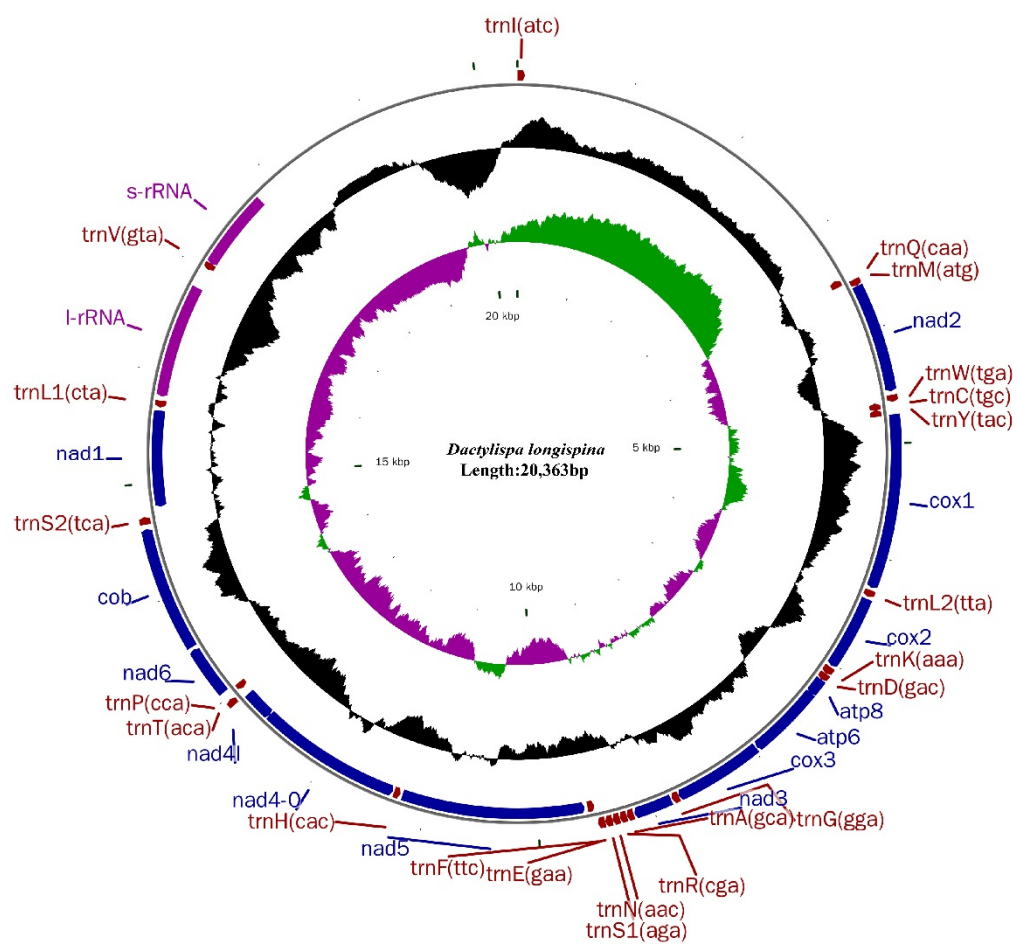

C

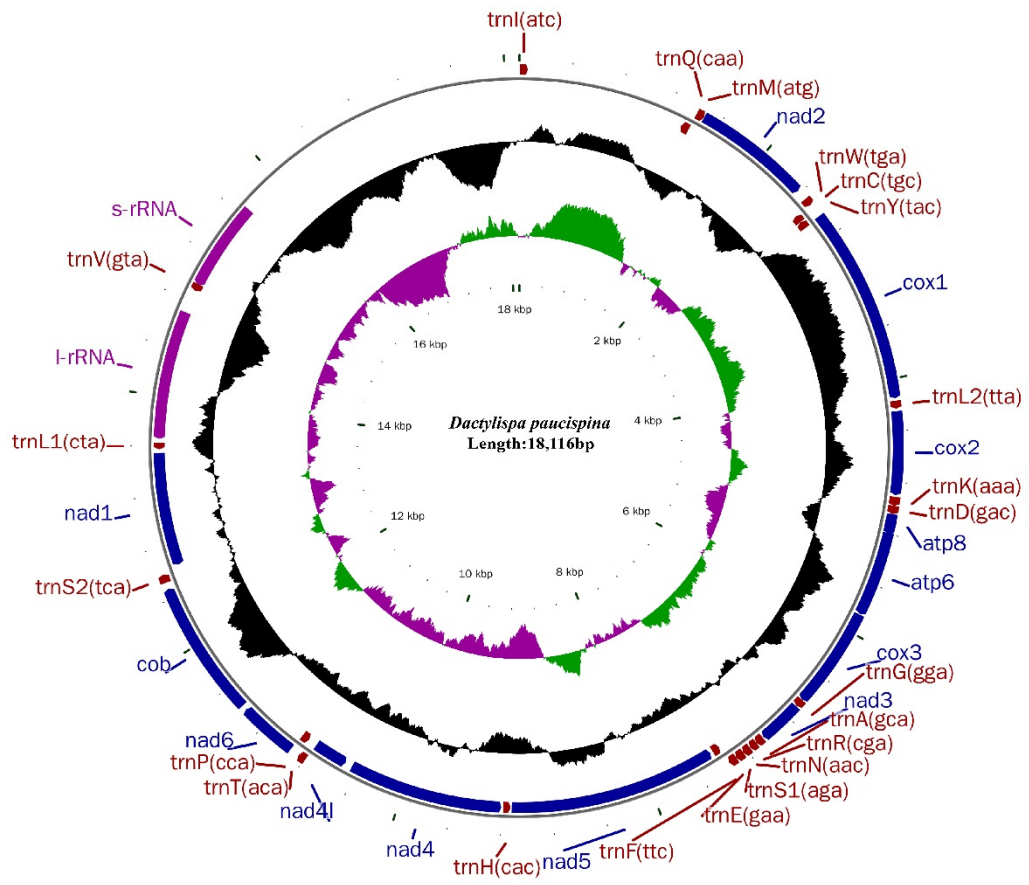

D

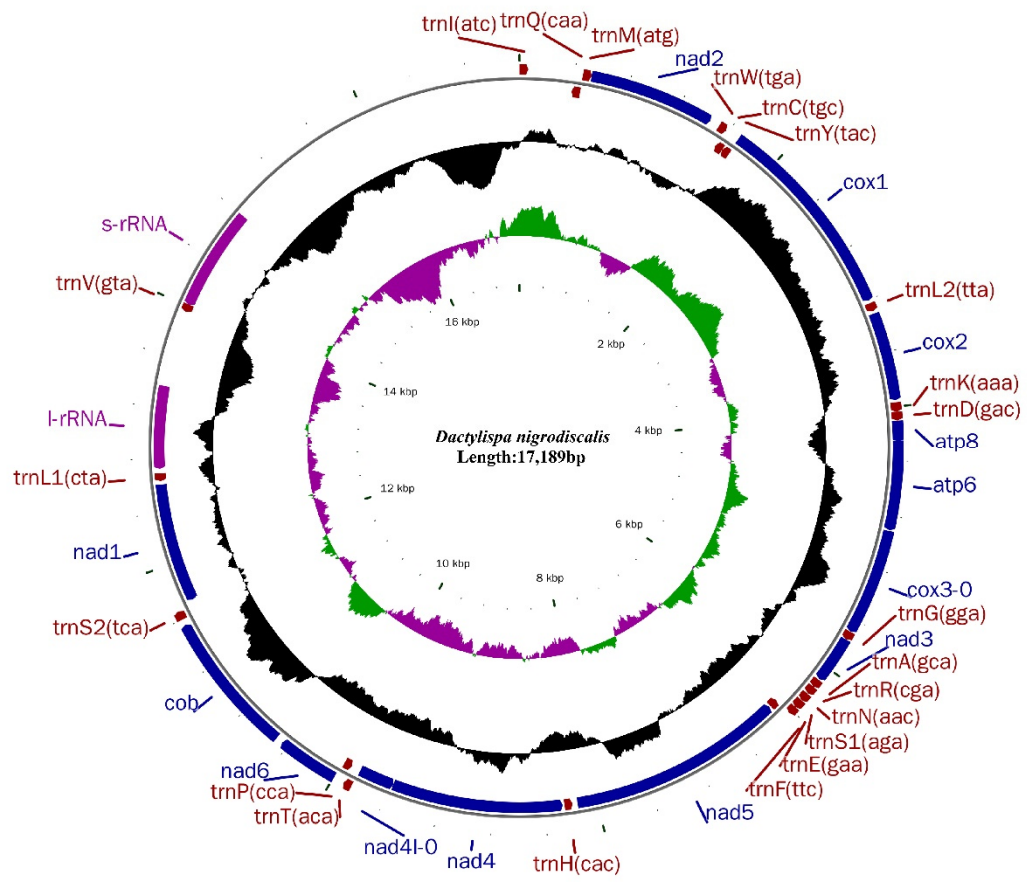

E

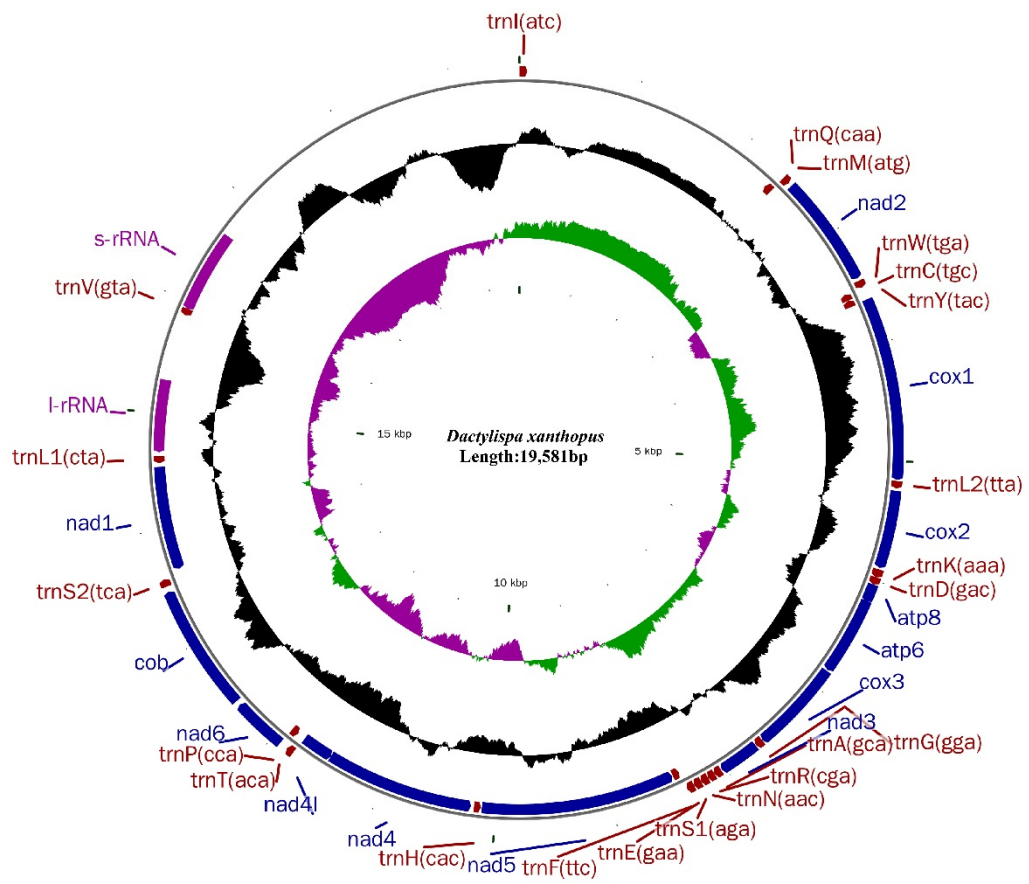

F

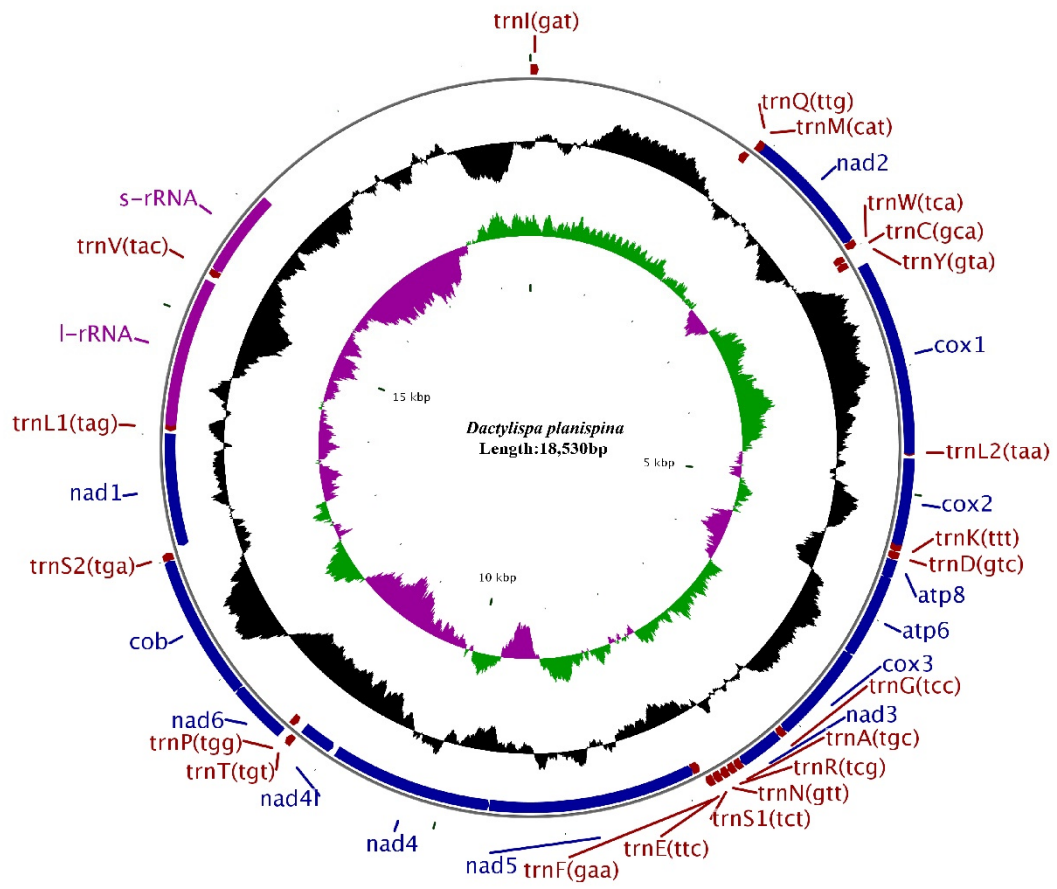

G

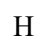

Supplement: s1 [file s1]
